# Supplementary material
Source: Springer Nature journal article supplement (https://www.springermedizin.de/resource/supplementary/12879_2012_2419_MOESM1_ESM.pdf/9444548)
Supplement: MOESM1 [file 9444548]

| <b>Number of cases</b> | <b>Year</b> | <b>Season</b> | <b>Age-range</b> | <b>Gender</b> | <b>Public Health Unit</b>   | <b>Population Estimates</b> |
|------------------------|-------------|---------------|------------------|---------------|-----------------------------|-----------------------------|
| 0                      | 2007        | Fall          | 30-34            | Female        | City of Toronto Health Unit | 108866                      |
| 0                      | 2007        | Spring        | 30-34            | Female        | City of Toronto Health Unit | 108866                      |
| 2                      | 2007        | Summer        | 30-34            | Female        | City of Toronto Health Unit | 108866                      |
| 1                      | 2007        | Winter        | 30-34            | Female        | City of Toronto Health Unit | 108866                      |
| 1                      | 2007        | Fall          | 30-34            | Male          | City of Toronto Health Unit | 104869                      |
| 1                      | 2007        | Spring        | 30-34            | Male          | City of Toronto Health Unit | 104869                      |
| 4                      | 2007        | Summer        | 30-34            | Male          | City of Toronto Health Unit | 104869                      |
| 0                      | 2007        | Winter        | 30-34            | Male          | City of Toronto Health Unit | 104869                      |
| 1                      | 2008        | Fall          | 30-34            | Female        | Waterloo Health Unit        | 18384                       |
| 0                      | 2008        | Spring        | 30-34            | Female        | Waterloo Health Unit        | 18384                       |
| 0                      | 2008        | Summer        | 30-34            | Female        | Waterloo Health Unit        | 18384                       |
| 0                      | 2008        | Winter        | 30-34            | Female        | Waterloo Health Unit        | 18384                       |
| 0                      | 2008        | Fall          | 30-34            | Male          | Waterloo Health Unit        | 19080                       |
| 1                      | 2008        | Spring        | 30-34            | Male          | Waterloo Health Unit        | 19080                       |
| 0                      | 2008        | Summer        | 30-34            | Male          | Waterloo Health Unit        | 19080                       |
| 0                      | 2008        | Winter        | 30-34            | Male          | Waterloo Health Unit        | 19080                       |
| 0                      | 2009        | Fall          | 30-34            | Female        | Waterloo Health Unit        | 18432                       |
| 1                      | 2009        | Spring        | 30-34            | Female        | Waterloo Health Unit        | 18432                       |
| 0                      | 2009        | Summer        | 30-34            | Female        | Waterloo Health Unit        | 18432                       |
| 1                      | 2009        | Winter        | 30-34            | Female        | Waterloo Health Unit        | 18432                       |
| 0                      | 2009        | Fall          | 30-34            | Male          | Waterloo Health Unit        | 18950                       |
| 1                      | 2009        | Spring        | 30-34            | Male          | Waterloo Health Unit        | 18950                       |
| 1                      | 2009        | Summer        | 30-34            | Male          | Waterloo Health Unit        | 18950                       |
| 0                      | 2009        | Winter        | 30-34            | Male          | Waterloo Health Unit        | 18950                       |
| 1                      | 2008        | Fall          | 55-59            | Female        | YorkRegional Health Unit    | 30605                       |
| 1                      | 2008        | Spring        | 55-59            | Female        | YorkRegional Health Unit    | 30605                       |
| 0                      | 2008        | Summer        | 55-59            | Female        | YorkRegional Health Unit    | 30605                       |
| 2                      | 2008        | Winter        | 55-59            | Female        | YorkRegional Health Unit    | 30605                       |
| 0                      | 2008        | Fall          | 55-59            | Male          | YorkRegional Health Unit    | 30007                       |
| 0                      | 2008        | Spring        | 55-59            | Male          | YorkRegional Health Unit    | 30007                       |
| 0                      | 2008        | Summer        | 55-59            | Male          | YorkRegional Health Unit    | 30007                       |
| 0                      | 2008        | Winter        | 55-59            | Male          | YorkRegional Health Unit    | 30007                       |
